# Supplementary material for: G-domain prediction across the diversity of G protein families
Source: Research Square preprint supplement (doi:10.21203/rs.3.rs-1102638/v1), 2021-12-02
Supplement: Supplementary file 4 [file Copy of Miro.xlsx]

## Sheet: Sheet0
Entry	Entry name	Status	Protein names	Gene names	Organism	Length	Sequence	Cross-reference (PDB)	Binding site	Nucleotide binding
F4J0W4	MIRO2_ARATH	reviewed	Mitochondrial Rho GTPase 2 (AtMIRO2) (EC 3.6.5.-) (Calcium-binding GTPase) (AtCBG) (Miro-related GTPase 2)	MIRO2 At3g63150 T20O10.250	Arabidopsis thaliana (Mouse-ear cress)	643	MMLGGKSSAGGRTSLRVAVAGDKGTGKSSLISAVASETFPDNVPRVLPPITLPADAFPDYIPITIVDTPSSIDNRIKLIEEFRKADVVLLTYACDQPSTLDRLSSYWLPELRRLEIKAPVIVVGCKLDLRDERSPARLEDIMSPIMKEYREIETCIECSALTLIQVPDVFYFASKAVLHPTFPLFDQEKQCLKPRLRRAVQRIFNLCDHDLDGALNDAELNDFQVNCFGAPLDPVELMGVKKVVQERQPDGVTDLGLTLPGFLFLFSLFIERGRPETAWAILRKCGYNDSLELHAELLPVPAKQSPDQSIELTNEAMDFLSGIFQLYDLDNDGALQPAELDDLFQTAPDSPWLEDPYKEAAEKTPGGSLTINGFLSEWALMTLLDPRKSLANLTYIGYG…
Q8IXI1	MIRO2_HUMAN	reviewed	Mitochondrial Rho GTPase 2 (MIRO-2) (hMiro-2) (EC 3.6.5.-) (Ras homolog gene family member T2)	RHOT2 ARHT2 C16orf39	Homo sapiens (Human)	618	MRRDVRILLLGEAQVGKTSLILSLVGEEFPEEVPPRAEEITIPADVTPEKVPTHIVDYSEAEQTDEELREEIHKANVVCVVYDVSEEATIEKIRTKWIPLVNGGTTQGPRVPIILVGNKSDLRSGSSMEAVLPIMSQFPEIETCVECSAKNLRNISELFYYAQKAVLHPTAPLYDPEAKQLRPACAQALTRIFRLSDQDLDQALSDEELNAFQKSCFGHPLAPQALEDVKTVVCRNVAGGVREDRLTLDGFLFLNTLFIQRGRHETTWTILRRFGYSDALELTADYLSPLIHVPPGCSTELNHLGYQFVQRVFEKHDQDRDGALSPVELQSLFSVFPAAPWGPELPRTVRTEAGRLPLHGYLCQWTLVTYLDVRSCLGHLGYLGYPTLCEQDQAHAITV…	5KUT;		NP_BIND 11 18 GTP 1. {ECO:0000255}.; NP_BIND 57 61 GTP 1. {ECO:0000255}.; NP_BIND 118 121 GTP 1. {ECO:0000255}.; NP_BIND 423 430 GTP 2. {ECO:0000255}.; NP_BIND 459 463 GTP 2. {ECO:0000255}.; NP_BIND 524 527 GTP 2. {ECO:0000255}.
Q8IXI2	MIRO1_HUMAN	reviewed	Mitochondrial Rho GTPase 1 (MIRO-1) (hMiro-1) (EC 3.6.5.-) (Rac-GTP-binding protein-like protein) (Ras homolog gene family member T1)	RHOT1 ARHT1	Homo sapiens (Human)	618	MKKDVRILLVGEPRVGKTSLIMSLVSEEFPEEVPPRAEEITIPADVTPERVPTHIVDYSEAEQSDEQLHQEISQANVICIVYAVNNKHSIDKVTSRWIPLINERTDKDSRLPLILVGNKSDLVEYSSMETILPIMNQYTEIETCVECSAKNLKNISELFYYAQKAVLHPTGPLYCPEEKEMKPACIKALTRIFKISDQDNDGTLNDAELNFFQRICFNTPLAPQALEDVKNVVRKHISDGVADSGLTLKGFLFLHTLFIQRGRHETTWTVLRRFGYDDDLDLTPEYLFPLLKIPPDCTTELNHHAYLFLQSTFDKHDLDRDCALSPDELKDLFKVFPYIPWGPDVNNTVCTNERGWITYQGFLSQWTLTTYLDVQRCLEYLGYLGYSILTEQESQASAV…	5KSO;5KSP;5KSY;5KSZ;5KTY;5KU1;		NP_BIND 11 18 GTP 1.; NP_BIND 57 61 GTP 1. {ECO:0000255}.; NP_BIND 118 121 GTP 1. {ECO:0000255}.; NP_BIND 425 432 GTP 2.; NP_BIND 463 467 GTP 2. {ECO:0000255}.; NP_BIND 527 530 GTP 2. {ECO:0000255}.
Q8IMX7	MIRO_DROME	reviewed	Mitochondrial Rho GTPase (Miro) (dMiro) (EC 3.6.5.-)	Miro CG5410	Drosophila melanogaster (Fruit fly)	652	MGQYTASQRKNVRILLVGDAGVGKTSLILSLVSEEYPEEVPPRAEEITIPANVTPEQVPTSIVDFSAVEQSEDALAAEINKAHVVCIVYAVDDDDTLDRITSHWLPLVRAKCNPSLDGEGDAEAEAEGDTQREPIRKPIVLVGNKIDLIEYSTMDSVLAIMEDYPEIESCVECSAKSLHNISEMFYYAQKAVLHPTSPLYMMEEQELTSACKKSLVRIFKICDIDGDNLLNDYELNLFQRRCFNTPLQPQILDEVKAVIQKNVPDGIYNDAVTLKGFLFLHCLFIQRGRNETTWAVLRRFGYNDQLEMCQEYLRPPLKIPPGSSTELSHRGQQFLIAVFERYDRDGDGALSPEEHKMLFSTCPAAPWSYSTDIRKSCPINETTGWVTLHGWLCRWTLMT…	4C0J;4C0K;4C0L;		NP_BIND 18 25 GTP 1. {ECO:0000255}.; NP_BIND 64 68 GTP 1. {ECO:0000255}.; NP_BIND 144 147 GTP 1. {ECO:0000255}.; NP_BIND 453 460 GTP 2. {ECO:0000255}.; NP_BIND 491 495 GTP 2. {ECO:0000255}.; NP_BIND 558 561 GTP 2. {ECO:0000255}.
P39722	GEM1_YEAST	reviewed	Mitochondrial Rho GTPase 1 (EC 3.6.5.-) (GTPase EF-hand protein of mitochondria 1)	GEM1 YAL048C	Saccharomyces cerevisiae (strain ATCC 204508 / S288c) (Baker's yeast)	662	MTKETIRVVICGDEGVGKSSLIVSLTKAEFIPTIQDVLPPISIPRDFSSSPTYSPKNTVLIDTSDSDLIALDHELKSADVIWLVYCDHESYDHVSLFWLPHFRSLGLNIPVILCKNKCDSISNVNANAMVVSENSDDDIDTKVEDEEFIPILMEFKEIDTCIKTSAKTQFDLNQAFYLCQRAITHPISPLFDAMVGELKPLAVMALKRIFLLSDLNQDSYLDDNEILGLQKKCFNKSIDVNELNFIKDLLLDISKHDQEYINRKLYVPGKGITKDGFLVLNKIYAERGRHETTWAILRTFHYTDSLCINDKILHPRLVVPDTSSVELSPKGYRFLVDIFLKFDIDNDGGLNNQELHRLFKCTPGLPKLWTSTNFPFSTVVNNKGCITLQGWLAQWSMTT…			NP_BIND 12 19 GTP 1. {ECO:0000305}.; NP_BIND 62 64 GTP 1. {ECO:0000255}.; NP_BIND 116 119 GTP 1. {ECO:0000255}.; NP_BIND 455 462 GTP 2. {ECO:0000305}.; NP_BIND 491 495 GTP 2. {ECO:0000255}.; NP_BIND 560 563 GTP 2. {ECO:0000255}.
Q8BG51	MIRO1_MOUSE	reviewed	Mitochondrial Rho GTPase 1 (MIRO-1) (EC 3.6.5.-) (Ras homolog gene family member T1)	Rhot1 Arht1	Mus musculus (Mouse)	631	MRAGRVRPLRASDMKKDVRILLVGEPRVGKTSLIMSLVSEEFPEEVPPRAEEITIPADVTPERVPTHIVDYSEAEQSDEQLHQEISQANVICIVYAVNNKHSIDKVTSRWIPLINERTDKDSRLPLILVGNKSDLVEYSSMETILPIMNQYTEIETCVECSAKNLKNISELFYYAQKAVLHPTGPLYCPEEKEMKPACIKALTRIFKISDQDNDGTLNDAELNFFQRICFNTPLAPQALEDVKNVVRKHLSDGVADSGLTLRGFLFLHTLFIQRGRHETTWTVLRRFGYDDDLDLTPEYLFPLLKIPPDCTTELNHHAYLFLQSTFDKHDLDRDCALSPDELKDLFQVFPYIPWGPDVNNTVCTNERGWITYQGFLSQWTLTTYLDVQRCLEYLGYLGY…			NP_BIND 24 31 GTP 1. {ECO:0000255}.; NP_BIND 70 74 GTP 1. {ECO:0000255}.; NP_BIND 131 134 GTP 1. {ECO:0000255}.; NP_BIND 438 445 GTP 2. {ECO:0000255}.; NP_BIND 476 480 GTP 2. {ECO:0000255}.; NP_BIND 540 543 GTP 2. {ECO:0000255}.
Q8RXF8	MIRO1_ARATH	reviewed	Mitochondrial Rho GTPase 1 (AtMIRO1) (EC 3.6.5.-) (Miro-related GTPase 1)	MIRO1 At5g27540	Arabidopsis thaliana (Mouse-ear cress)	648	MARYAAGAVDCPGSPKSVRIVVVGDKGTGKSSLIVAAATDSFPPNVPPVLPDYKLPIEFFPDGIPVTIVDTSSRPEDRDIVAEELKRADAVVLTYACDRPETLERLSEYWLPELRRLEVKIPIIVAGCKLDFRDDNNQVSLEQVMSPIMQQFREIETCIECSALKQLQAQEVFYYAQKTVLHPTGPLFDQDSQALKPRCVRALKRIFILCDHDRDGALSEAELNDFQVKCFHAPLQPSEIEGVKRVVQEKLPEGVNERGLTVTGFLFLHALFIEKGRLETTWTVLRKFGYNNDIRLAEELLPSAIFKRAPDQSFELTNAAIDFLKGMYMLFDDDQDNNLRPQEIEDLFSTAPESPWKEAPYEDAAEKTALGGLSFDAFLSMWSLMTLLEPARSVENLIY…
Q55G45	GEMA_DICDI	reviewed	Probable mitochondrial Rho GTPase gemA (Miro) (EC 3.6.5.-)	gemA DDB_G0267830	Dictyostelium discoideum (Slime mold)	658	MKNNIKVILIGDEQVGKSTIINSFISESFSEITQKTLPEVTIPAEFNNEICSTRIIDTFDDGKNLKNQMNMEIRTADAIVIVYSVDRFDTFMSIRMKWIPLINQLRGSNKSPIIIVGNKLDLVDDKHENNKVQIEETIQYFRSTYSNTIQWLECSAKTMENLPELLYASQTSVFFPERILYNREENKMTEGCERALKRIFKLCDHDNDGSLSEEEINYFQTKCGHETMTSEEIQNIQQFVLSKIPDGVNSNGFTEKGFLYMNLLFLLRGPCQHTWTSLRSFNYDDDLVLLESYVHPTLQVPPNHNTILSSMGNEFFKSLFEKYDSDSDGVLSSFDLVSLFSTTPKIPWEIGFEKHFNTDKDSNLTLSGFLSLWNLQTYENYKVTLEYLAYFGSQTENNN…			NP_BIND 11 18 GTP 1. {ECO:0000255}.; NP_BIND 57 62 GTP 1. {ECO:0000255}.; NP_BIND 118 121 GTP 1. {ECO:0000255}.; NP_BIND 429 436 GTP 2. {ECO:0000255}.; NP_BIND 466 468 GTP 2. {ECO:0000255}.; NP_BIND 530 533 GTP 2. {ECO:0000255}.
Q8JZN7	MIRO2_MOUSE	reviewed	Mitochondrial Rho GTPase 2 (MIRO-2) (EC 3.6.5.-) (Ras homolog gene family member T2)	Rhot2 Arht2	Mus musculus (Mouse)	620	MRRDVRILLLGEAQVGKTSLILSLVGEEFPEEVPARAEEITIPADVTPEKVPTHIVDYSEAEQTEEELQEEIHKANVVCVVYDVSEETTIEKIRTKWIPLVNGRTATGPRLPIILVGNKSDLRPGSTMEAVLPIMSQFPEIETCVECSAKHLRNISELFYYAQKAVLHPTAPLYDPEAKQLRPACAQALTRIFRLSDQDRDHGLSDEELNAFQKSCFGHPLAPQALEDVKRVVCKNVSGGVQNDRLTLEGFLFLNTLFIQRGRHETTWTILRRFGYSDSLELTPDYLYPALHVPPGCSTELNHRGYQFVQRMFEKHDQDHDGVLSPTELQNLFSVFSGAPWGPELLHTVPTQAGCLPLHGYLCQWTLMTYLDVQQCLAHLGYLGYPTLCEQDSQAQAIT…			NP_BIND 11 18 GTP 1. {ECO:0000255}.; NP_BIND 57 61 GTP 1. {ECO:0000255}.; NP_BIND 118 121 GTP 1. {ECO:0000255}.; NP_BIND 424 431 GTP 2. {ECO:0000255}.; NP_BIND 461 465 GTP 2. {ECO:0000255}.; NP_BIND 526 529 GTP 2. {ECO:0000255}.
Q7TSA0	MIRO2_RAT	reviewed	Mitochondrial Rho GTPase 2 (MIRO-2) (EC 3.6.5.-) (Ras homolog gene family member T2)	Rhot2 Arht2	Rattus norvegicus (Rat)	622	MRRDVRILLLGEAQVGKTSLILSLVGEEFPEEVPARAEEITIPADVTPEKVPTHIVDYSEAEQTEEELQEEIHKANVVCVVYDVSEEATIEKIRTKWIPLVNGRTATGPRLPIILVGNKSDLRPGSTIEAVLPIMSQFPEIETCVECSAKHLRNISELFYYAQKAVLHPTAPLYDPEAKQLRPACAQALTRIFRLSDQDLDHALSDKELNAFQKSCFGHPLAPQALEDVKRVVCKNVAGGVQDDRLTLEGFLFLNTLFIQRGRHETTWTILRRFGYSDSLELTPDYLCPPLYVPPGCSTELNHRGYQFVQRVFEKHDQDHDGVLSPTELESLFSVFSVAPWGPELLHTVPTEAGCLSLRGYLCQWTLVTYLDVQHCLAHLGYLGYPTLCEQDSQAQAIT…			NP_BIND 11 18 GTP 1. {ECO:0000255}.; NP_BIND 57 61 GTP 1. {ECO:0000255}.; NP_BIND 118 121 GTP 1. {ECO:0000255}.; NP_BIND 424 431 GTP 2. {ECO:0000255}.; NP_BIND 463 467 GTP 2. {ECO:0000255}.; NP_BIND 528 531 GTP 2. {ECO:0000255}.
O59781	GEM1_SCHPO	reviewed	Mitochondrial Rho GTPase 1 (EC 3.6.5.-) (GTPase EF-hand protein of mitochondria 1)	gem1 SPCC320.04c	Schizosaccharomyces pombe (strain 972 / ATCC 24843) (Fission yeast)	630	MKEVRVVICGDQGVGKSSLISALIQEDNVTSIPKVFPIISIPSNPDSNDDVSLVLVDTQSDSNEREYLAAEIKKANVICLVYSDNYSYERVSIFWLPYFRSLGVNVPIVLCENKSEDLDNYQGLHTIEHEMIPLINEFKEIEACILCSALEKINVNELFYMCRACVIYPITPLWDAKERTMRKATIHALSRIFFLIDKNNDDLLSVDELNSLSEKCFSKNLSIEDASEILSKVKEICPEGVYEGQLTLPGFLAYNRVQVENGKQESTWGILRAFHYTDSLSLDDSYLSPKFEVAPGQIVELSPKGYRFLVDLFYQFDRDNDGALNNEELSALFRHTPGLPEIWVSSQFPNSTVLNEHGYVTYNGWLAQWSMITLFDYKTTLAYLAYLGFDTDGRGHNTD…			NP_BIND 10 17 GTP 1. {ECO:0000255}.; NP_BIND 57 61 GTP 1. {ECO:0000255}.; NP_BIND 113 116 GTP 1. {ECO:0000255}.; NP_BIND 428 435 GTP 2. {ECO:0000255}.; NP_BIND 459 463 GTP 2. {ECO:0000255}.; NP_BIND 527 530 GTP 2. {ECO:0000255}.
Q5ABR2	GEM1_CANAL	reviewed	Mitochondrial Rho GTPase 1 (EC 3.6.5.-) (GTPase EF-hand protein of mitochondria 1)	GEM1 CAALFM_C100890WA CaO19.13437 CaO19.6016	Candida albicans (strain SC5314 / ATCC MYA-2876) (Yeast)	716	MSPDAIRVVVCGDDAVGKSSLITSLIKETIIEPQTNNVLPPITISRNDYIESSQEYLNDQDHHHHHQSSPSTMKNKRKHNNKRERERERESSINNVQPNEISEYIPNITTIIDTSSSDMTNLQKELKRADVIWLVYSDHYTYERISLHWMPLFRSMGVNLPIILCANKSDLFPKSKSNLKSTNSDEFVPLINEFKEIEAGVRCSAKNNYNVVEAFYLCQRAVTHPISPIFDAKEGNLKPGAIKPLKRIFWLSDTDQDGYLNFEELSELHKKCFGIEASKSDYEEIVNLIDQKILPSYNTTIETQTPPQQQHLATSAGTPNGTTTTTSKGISEDGFILLNKIYAESGRHETVWCILRAYHYTNSLSLSDKFLYPRLDVNPHSSVELSPTGYKFFVDLFIK…			NP_BIND 84 91 GTP 1. {ECO:0000255}.; NP_BIND 113 115 GTP 1. {ECO:0000255}.; NP_BIND 167 170 GTP 1. {ECO:0000255}.; NP_BIND 514 521 GTP 2. {ECO:0000255}.; NP_BIND 550 554 GTP 2. {ECO:0000255}.; NP_BIND 620 623 GTP 2. {ECO:0000255}.
Q2HJF8	MIRO1_BOVIN	reviewed	Mitochondrial Rho GTPase 1 (MIRO-1) (EC 3.6.5.-) (Ras homolog gene family member T1)	RHOT1 ARHT1	Bos taurus (Bovine)	631	MPAGRGRPLRAADMKKDVRILLVGEPRVGKTSLIMSLVSEEFPEEVPPRAEEITIPADVTPERVPTHIVDYSEAEQSDEQLHQEISQANVICIVYAVNNKHSIDKVTSRWIPLINERTDKDSRLPLILVGNKSDLVEYSSMETILPIMNQYTEIETCVECSAKNLKNISELFYYAQKAVLHPTGPLYCPEEKEMKPACIKALTRIFKISDQDNDGTLNDAELNFFQRICFNTPLAPQALEDVKNVVRKHISDGVADGGLTLKGFLFLHTLFIQRGRHETTWTVLRRFGYDDDLDLTPEYLFPLLKIPPDCTTELNHHAYLFLQSTFDKHDLDRDCALSPDELKDLFKVFPYIPWGPDVNNTVCTNEKGWITYQGFLSQWTLTTYLDVQRCLEYLGYLGY…			NP_BIND 24 31 GTP 1. {ECO:0000255}.; NP_BIND 70 74 GTP 1. {ECO:0000255}.; NP_BIND 131 134 GTP 1. {ECO:0000255}.; NP_BIND 438 445 GTP 2. {ECO:0000255}.; NP_BIND 476 480 GTP 2. {ECO:0000255}.; NP_BIND 540 543 GTP 2. {ECO:0000255}.
Q6NVC5	MIRO1_DANRE	reviewed	Mitochondrial Rho GTPase 1-A (MIRO-1-A) (EC 3.6.5.-) (Ras homolog gene family member T1-A)	rhot1a zgc:55581	Danio rerio (Zebrafish) (Brachydanio rerio)	619	MRKDVRILLVGEPKVGKTSLIMSLVSEEFPDEVPPRAEEITIPADVTPERVPTHIVDYSEAEQSDEQLYQEITKANVICIVYSVNNKKSIEKVTSHWIPLINERTDKDSRVPLILVGNKSDLVEHSSMETILPIMNQYSEIETCVECSAKNLKNISELFYYAQKAVLHPTGPLYSPEEKEMKPSCIKALTRIFKISDLDNDGILNDNELNFFQRTCFNIPLAPQALEDVKNVVRKNMTDGVKDNGLTLKGFLFLHTLFIQRGRHETTWTVLRRFGYDDDLELTQEYLFPLFKIPPDCTTELNHNAYLFLQSVFDKHDKDRDCALSPDELKDLFKVFPYMPWGPDVNNTVCTNEQGWITYQGYLSQWTLTTYLDVQRCLEYLGYLGYSIIQEQESQAAAI…			NP_BIND 11 18 GTP 1. {ECO:0000255}.; NP_BIND 57 61 GTP 1. {ECO:0000255}.; NP_BIND 118 121 GTP 1. {ECO:0000255}.; NP_BIND 425 432 GTP 2. {ECO:0000255}.; NP_BIND 463 467 GTP 2. {ECO:0000255}.; NP_BIND 528 531 GTP 2. {ECO:0000255}.
Q32LU1	MIRO2_DANRE	reviewed	Mitochondrial Rho GTPase 2 (MIRO-2) (EC 3.6.5.-) (Ras homolog gene family member T2)	rhot2 zgc:123249	Danio rerio (Zebrafish) (Brachydanio rerio)	617	MKRDVRILLLGEPKVGKTSLIMSLVGEEFPEQVPLRAEEITIPADVTPEKVPTHIVDYSENEQTDEVLREEIVKANVVCVVYDVTQEETIDKIRTKWIPLVNGGAEKGSKIPIILVGNKSDLRSGSSMETILPIMNQFSEIETCVECSAKNLKNISELFYYAQKAVLHPTAPLYDPEDKQLKAQCVRALSRIFSISDQDNDHILSDAELNCFQKLCFGNPLAPQALEDVKTVVWKNTSDGVQDNGLTLNGFLFLNTLFIQRGRHETTWTILRKFGYDDTLELTDDYLYPVLRVSVGCTTELNHLGHQFLLKLFEKYDEDKDSALSPAELKNLFSVLPYMPWSSTVYSNIPLTDDCYISQHGYLCQWMLLAYLDVHRCLEHLGYLGYPILMEQECQTSAI…			NP_BIND 11 18 GTP 1. {ECO:0000255}.; NP_BIND 57 61 GTP 1. {ECO:0000255}.; NP_BIND 118 121 GTP 1. {ECO:0000255}.; NP_BIND 425 432 GTP 2. {ECO:0000255}.; NP_BIND 462 466 GTP 2. {ECO:0000255}.; NP_BIND 527 530 GTP 2. {ECO:0000255}.
Q5E9M9	MIRO2_BOVIN	reviewed	Mitochondrial Rho GTPase 2 (MIRO-2) (EC 3.6.5.-) (Ras homolog gene family member T2)	RHOT2 ARHT2	Bos taurus (Bovine)	618	MKRDVRILLLGEAQVGKTSLILSLVGEEFPEEVPARAEEITIPADVTPEKVPTHIVDYSETEQTVEELQGEIDKADVVCVVYDVSEEATVEKIRTKWIPLVNGDTKRGPRVPIILVGNKSDLRPGGSMEAVLPIMSQFPEIETCVECSAKNLKNISELFYYAQKAVLHPTAPLYDPEAKQLRPACAQALTRIFRLSDQDMDQALSDQELNAFQTSCFGHPLAPQALEDVKMVVSKNVVGGVRDDQLTLDGFLFLNTLFIQRGRHETTWTILRRFGYGDSLELTADYLCPPLRVPPGCSAELNHRGYQFVQRMFEKHDQDRDGALSPAELQSLFSVFPAAPWGPHLPSTVRTKAGRLPLHGYLCQWTLVTYLDVRRSLEHLGYLGYPTLCEQDSQAHAIT…			NP_BIND 11 18 GTP 1. {ECO:0000255}.; NP_BIND 57 61 GTP 1. {ECO:0000255}.; NP_BIND 118 121 GTP 1. {ECO:0000255}.; NP_BIND 424 431 GTP 2. {ECO:0000255}.; NP_BIND 459 463 GTP 2. {ECO:0000255}.; NP_BIND 524 527 GTP 2. {ECO:0000255}.
Q864R5	MIRO2_PIG	reviewed	Mitochondrial Rho GTPase 2 (MIRO-2) (EC 3.6.5.-) (Ras homolog gene family member T2)	RHOT2 ARHT2	Sus scrofa (Pig)	620	MKRDVRILLLGEAQVGKTSLILSLVGEEFPEEVPPRAEEITIPADVTPEKVPTHIVDYSEAEQTAEELQDEIQKASVVCVVYDVSEETTVEKIRTKWIPLVNGGTRRGPRVPIILVGNKSDLRPGGSMEAVLPIMSQFPEIETCVECSAKNLKNISELFYYAQKAVLHPTAPLYDPEAKQLRPACAQALTRIFRLSDQDMDQALSDQELNAFQTCCFGHPLAPQALEDVKLVVSRNVAGGVQDDRLTLDGFLFLNTLFIQRGRHETTWTILRRFGYSDSLELTPDYLFPALHVPPGCSAELNHHGYQFAQRMLEKHDQDRDGALSPAELESLFSVFPGPPWGPQLPRHRPHRGRSAAPARVPLPVDPGDLLGRPALSRAPWLPGLPHPLRAGLAGARHH…			NP_BIND 11 18 GTP 1. {ECO:0000255}.; NP_BIND 57 61 GTP 1. {ECO:0000255}.; NP_BIND 118 121 GTP 1. {ECO:0000255}.; NP_BIND 424 431 GTP 2. {ECO:0000255}.; NP_BIND 461 465 GTP 2. {ECO:0000255}.; NP_BIND 526 529 GTP 2. {ECO:0000255}.
Q758X6	GEM1_ASHGO	reviewed	Mitochondrial Rho GTPase 1 (EC 3.6.5.-) (GTPase EF-hand protein of mitochondria 1)	GEM1 ADR402W	Ashbya gossypii (strain ATCC 10895 / CBS 109.51 / FGSC 9923 / NRRL Y-1056) (Yeast) (Eremothecium gossypii)	661	MAKERIRIVVCGDKGVGKSSLIACLVKDQFIPNLQDALPAVTIPRDFSASPYSPQNTILVDTKNSDLAGLQKELKNADVIWLVYADHDSYERIALYWMMMFRSLGLNLPVILCRNKSDDGIEYCRSNLTAGGEGDCGTIVEDEEFIPILKAFKEVETCIKCSAKNKLNVNQAFYLCQRAITHPLAPLFDARIGELKPLAIQALKRIFVLSDKDQDDYLSSEEIAALQKKCFGKTMDVNELNFIYKTLVDLSASNQQYADCSLFVQNKGITKMGFLVLNKMYAENGRHETTWGILRSFHYTDSLSISDKVLYPKVDITDTSSVELSPLGYRFLVDVFLAFDKDNDGGLNEDELNVLFKCTPGLPKLWSETCFPYSTVVNNRGFITLQGWLAHWSMTTFID…			NP_BIND 12 19 GTP 1. {ECO:0000255}.; NP_BIND 61 63 GTP 1. {ECO:0000255}.; NP_BIND 115 118 GTP 1. {ECO:0000255}.; NP_BIND 452 459 GTP 2. {ECO:0000255}.; NP_BIND 488 492 GTP 2. {ECO:0000255}.; NP_BIND 557 560 GTP 2. {ECO:0000255}.
Q9MA88	MIRO3_ARATH	reviewed	Mitochondrial Rho GTPase 3 (AtMIRO3) (EC 3.6.5.-) (Miro-related GTPase 3)	MIRO3 At3g05310 T12H1.28	Arabidopsis thaliana (Mouse-ear cress)	648	MWMGVGDSSGSPKPIRIVVVGEKGSGKSSLIMAAARNTFHPNIPSLLPYTNLPSEFFPDRIPATVIDTSSRPEDKGKVVKEVRQADAIVLTFAFDRPETLDRLSKYWLPLFRQLEVRVPIIVAGYEVDNKEAYNHFSIEQITSALMKQYREVETSIQWSAQRLDQAKDVLYYAQKAVIDPVGPVFDQENNVLKPRCIAALKRIFLLSDHNMDGILSDEELNELQKKCFDTPLVPCEIKQMKNVMQVTFPQGVNERGLTLDGFLFLNTRLIEEARIQTLWTMLRKFGYSNDLRLGDDLVPYSSFKRQADQSVELTNVAIEFLREVYEFFDSNGDNNLEPHEMGYLFETAPESPWTKPLYKDVTEENMDGGLSLEAFLSLWSLMTLIDPPRSLEYLMYIRF…
Q94263	MIRO1_CAEEL	reviewed	Mitochondrial Rho GTPase 1 (Miro) (EC 3.6.5.-)	miro-1 K08F11.5	Caenorhabditis elegans	625	MSDDETLADVRIVLIGDEGCGKTSLVMSLLEDEWVDAVPRRLDRVLIPADVTPENVTTSIVDLSIKEEDENWIVSEIRQANVICVVYSVTDESTVDGIQTKWLPLIRQSFGEYHETPVILVGNKSDGTANNTDKILPIMEANTEVETCVECSARTMKNVSEIFYYAQKAVIYPTRPLYDADTKQLTDRARKALIRVFKICDRDNDGYLSDTELNDFQKLCFGIPLTSTALEDVKRAVSDGCPDGVANDSLMLAGFLYLHLLFIERGRHETTWAVLRKFGYETSLKLSEDYLYPRITIPVGCSTELSPEGVQFVSALFEKYDEDKDGCLSPSELQNLFSVCPVPVITKDNILALETNQRGWLTYNGYMAYWNMTTLINLTQTFEQLAYLGFPVGRSGPGR…			NP_BIND 16 23 GTP 1. {ECO:0000255}.; NP_BIND 62 66 GTP 1. {ECO:0000255}.; NP_BIND 123 126 GTP 1. {ECO:0000255}.; NP_BIND 433 440 GTP 2. {ECO:0000255}.; NP_BIND 470 474 GTP 2. {ECO:0000255}.; NP_BIND 537 540 GTP 2. {ECO:0000255}.
Q5ZM73	MIRO1_CHICK	reviewed	Mitochondrial Rho GTPase 1 (MIRO-1) (EC 3.6.5.-) (Ras homolog gene family member T1)	RHOT1 RCJMB04_2p2	Gallus gallus (Chicken)	619	MKKDVRILLVGEPRVGKTSLIMSLVSEEFPEEVPPRAEEITIPADVTPERVPTHIVDYSEAEQNDEQLYHEISQANVICIVYAVNNKNSIDKVTSRWIPLINERTDKDSRLPLILVGNKSDLVEYSSMETILPIMNQYTEIETCVECSAKNLKNRSELFYYAQKAVLHPTGPLYCPEEKEMKPACIKALTRIFRISDQDNDGTLNDAELNFFQRICFNTPLAPQALEDVKNVVRKNVSDGVADNGLTLKGFLFLHTLFIQRGRHETTWTVLRRFGYDDDLELTPEYLFPLLKIPPDCTTELNHHAYLFLQSIFDKHDLDRDCALSPDELKDLFKVFPYMPWGPDVNNTVCTNGKGGWITYQGFLSQWTLTTYLDVQRCLEYLGYLGYSILAEQESQASA…			NP_BIND 11 18 GTP 1. {ECO:0000255}.; NP_BIND 57 61 GTP 1. {ECO:0000255}.; NP_BIND 118 121 GTP 1. {ECO:0000255}.; NP_BIND 426 433 GTP 2. {ECO:0000255}.; NP_BIND 464 468 GTP 2. {ECO:0000255}.; NP_BIND 528 531 GTP 2. {ECO:0000255}.
Q5ZM83	MIRO2_CHICK	reviewed	Mitochondrial Rho GTPase 2 (MIRO-2) (EC 3.6.5.-) (Ras homolog gene family member T2)	RHOT2 RCJMB04_2o8	Gallus gallus (Chicken)	618	MKRDVRILLLGEAQVGKTSLIMALVGEEFPEEVPPRAEEITIPADVTPEKVPTHIVDYSESEQTEDELQEEIAKANVVCVVYDVTKEATIEKIRTKWIPMVNGGAEKGARIPIILVGNKSDLQMGSSMEVILPIMNQFSEIETCVECSAKNLKNISELFYYAQKAVLHPTAPLYDPEEKQLRPACSRALTRIFNLSDQDNNQILSDDELNYFQKSCFGNPLAPQALEDVKMVVWKNTTDGVQDNGLTLNGFLFLNTLFIQRGRHETTWTILRRFGYDDELELTDDYLYPQFRLPPGCSTELNHLGYQFLQRLFEKHDKDQDGALSPAELQNFFSVFPCMPWGPELYNTVCTTDKGLLSLHGFLCQWTLIAYLDVRHCLECLGYLGYPILSEQDSQTQAL…			NP_BIND 11 18 GTP 1. {ECO:0000255}.; NP_BIND 57 61 GTP 1. {ECO:0000255}.; NP_BIND 118 121 GTP 1. {ECO:0000255}.; NP_BIND 425 432 GTP 2. {ECO:0000255}.; NP_BIND 462 466 GTP 2. {ECO:0000255}.; NP_BIND 527 530 GTP 2. {ECO:0000255}.
Q6DIS1	MIRO2_XENTR	reviewed	Mitochondrial Rho GTPase 2 (MIRO-2) (EC 3.6.5.-) (Ras homolog gene family member T2)	rhot2	Xenopus tropicalis (Western clawed frog) (Silurana tropicalis)	616	MKRDVRILLLGEAQVGKTSLIMALVGEEFPDEVPSRAEEITIPADVTPERIPTHIVDYSGVEQTEDELREEIAKANVVCVVYDVTDLETIEKIGSKWIPMVNGNAERNSRLPIILVGNKSDLQCGSSMESILPIMNQFSEIETCVECSAKNLKNISEVFYYAQKAVLHPTAPLYDPEEKQLRPQCKKALTRIFTISEQDNNQILSDEELNFFQQSCFGNPLAPQALEDVKMVVKKNTADGVRDNGLTLNGFLFLNTLFIQRGRHETTWTILRRFGYDDALELTDDYLYPPLRIPHESSTELNHFGYQFLQKAFEKHDLDEDGALSPSELQSFFSVFPYTPWGPELASTVCTAQGGYLPLHGYLCQWTLVAYLDVHRCLEHLGYLGYPILCEQESQTHAI…			NP_BIND 11 18 GTP 1. {ECO:0000255}.; NP_BIND 57 61 GTP 1. {ECO:0000255}.; NP_BIND 118 121 GTP 1. {ECO:0000255}.; NP_BIND 425 432 GTP 2. {ECO:0000255}.; NP_BIND 462 466 GTP 2. {ECO:0000255}.; NP_BIND 527 530 GTP 2. {ECO:0000255}.
P0CO78	GEM1_CRYNJ	reviewed	Mitochondrial Rho GTPase 1 (EC 3.6.5.-) (GTPase EF-hand protein of mitochondria 1)	GEM1 CNF03990	Cryptococcus neoformans var. neoformans serotype D (strain JEC21 / ATCC MYA-565) (Filobasidiella neoformans)	686	MPRRDLVRIVLVGDDGVGKSSIITSLIKEAFVTNVPHVVPEVTIPPEITPENFTTSIVDTSSNPRSRPHLLSSISRAHVICLVYSIADPSSFDRVAEYWLPLFRREGINVPVILVGNKIDLRGGRVTNQGLEDESAPIMREFKEVETVVECSALLPLNVSEVFYFAQKAVLHPTAPLYDSREHTLKPKCLEALKRIFTISDVDKDGLLNAHELNQFQQKCFSTPLQSQELDGILEIVRSYDPYAVQPLPSSSPNTPLSRDSSYGQLHYFNNNVVPPSPPQEGITELGFLYLHTMFIQQGRMETTWTVLRKFGYGESLDLREDFLAPKFDVPSDCSVELSPLGNQFLTDIFEAYDKDQDGALSQNELDDLFSTSPGNPWLSQGFPDTTITDDMGRVTLQG…			NP_BIND 13 20 GTP 1. {ECO:0000255}.; NP_BIND 59 63 GTP 1. {ECO:0000255}.; NP_BIND 117 120 GTP 1. {ECO:0000255}.; NP_BIND 464 471 GTP 2. {ECO:0000255}.; NP_BIND 506 510 GTP 2. {ECO:0000255}.; NP_BIND 574 577 GTP 2. {ECO:0000255}.
Q623S8	MIRO1_CAEBR	reviewed	Mitochondrial Rho GTPase 1 (Miro) (EC 3.6.5.-)	miro-1 CBG01740	Caenorhabditis briggsae	637	MSDGETLADVRIVLIGDEGCGKTSLVMSLLEDEWVDAVPRRLDRVLIPADVTPENVTTSIVDLSIKEEEDNWLISEMRQANVICVVYSVTDDTTVERIQEKWLPLIRQAFGEYHETPIILVGNKSDGTANNTDKLPSGQSLVSSLQILPIMEANTEVETCVECSARTMKNVSEIFYYAQKAVIYPTRPLYDADTKQLTDRAKKALIRVFKICDRDNDGYLSDTELNDFQKLCFGIPLTSTALEDVKRAVADGCPDGVASDALMLAGFLYLHLLFIERGRHETTWAVLRKFGYETSLKLAEEYLYPRITIPVGCSTELSPEGVQFVSALFEKYDEDKDGCLSPSELQNLFSVCSAPVITKDNILALETNQRGWLTYNGYMAYWNMTTLINLTQTFEQLAY…			NP_BIND 28 35 GTP 1. {ECO:0000255}.; NP_BIND 74 78 GTP 1. {ECO:0000255}.; NP_BIND 135 138 GTP 1. {ECO:0000255}.; NP_BIND 445 452 GTP 2. {ECO:0000255}.; NP_BIND 482 486 GTP 2. {ECO:0000255}.; NP_BIND 549 552 GTP 2. {ECO:0000255}.
Q6FIR8	GEM1_CANGA	reviewed	Mitochondrial Rho GTPase 1 (EC 3.6.5.-) (GTPase EF-hand protein of mitochondria 1)	GEM1 CAGL0M12276g	Candida glabrata (strain ATCC 2001 / CBS 138 / JCM 3761 / NBRC 0622 / NRRL Y-65) (Yeast) (Torulopsis glabrata)	649	MTKETIRVVICGDDGVGKTSLIVSLVKGQFIPNLQAVLPPVTIPRDFSSSPYSPKNTVLIDTDNSDPLAIQRELKNADVIWLVYSDKDSYERISLYWMITFRSLGLNIPVILCKNKCDQYTTNSPLEDFLDTKIEDEEFIPILMAFKEVDTCVKASAKTHFDVNQSFYLCQRSISYPISPLFDAKVGDLKPSAVAALSRIFFLSDEDQDGFLNDNEIMDLQRKCFGKSIDLNELNFIKHTLSDLTSSEEYPSEILYCQGKGLTKQGFIALNKIYTEKGRHETTWGILRAFNYTDSLSIDDAVLFPKVNVPEQASVELSSKGYRFLVDIFIKFDSDNDGALNDTELHTLFRSTPGLPNLWLETNFPASTVVNAKGFVTLQGWLAQWTMTTYLDYKITTAY…			NP_BIND 12 19 GTP 1. {ECO:0000255}.; NP_BIND 61 63 GTP 1. {ECO:0000255}.; NP_BIND 115 118 GTP 1. {ECO:0000255}.; NP_BIND 445 452 GTP 2. {ECO:0000255}.; NP_BIND 481 485 GTP 2. {ECO:0000255}.; NP_BIND 550 553 GTP 2. {ECO:0000255}.
Q298L5	MIRO_DROPS	reviewed	Mitochondrial Rho GTPase (Miro) (EC 3.6.5.-)	Miro GA18862	Drosophila pseudoobscura pseudoobscura (Fruit fly)	649	MGQYTVSTRKNVRILLVGDAGVGKTSLILSLVSEEYPEEVPPRAEEITIPANVTPEQVPTSIVDFSSVEQTEETLGLEINKAHVVCIVYSVDDDDSLDRITSHWLPLIRSKCNATLEGDAETEAETEAAGEGLRKPIVLVGNKIDLIDYSTMDSVLAIMEDFPEIESCVECSAKTLHNISEMFYYAQKAVLHPTSPLYIMEDQELTPACKKSLVRIFKICDTDGDNLLNDYELNLFQRRCFNTPLQPQILDEVKAVIQKNVPDGIYNDAVTLKGFLFLHCLFIQRGRNETTWAVLRRFGYNDQLEMCQEYLRPPLKIPPGSSTELSHRGQKFLISVFERYDRDCDGALSPEEHKMLFSVCPSSPWSYSTDIRKSCPINDKGWVTLHGWLCRWTLMTLID…			NP_BIND 18 25 GTP 1. {ECO:0000255}.; NP_BIND 64 68 GTP 1. {ECO:0000255}.; NP_BIND 142 145 GTP 1. {ECO:0000255}.; NP_BIND 450 457 GTP 2. {ECO:0000255}.; NP_BIND 488 492 GTP 2. {ECO:0000255}.; NP_BIND 555 558 GTP 2. {ECO:0000255}.
Q5B5L3	GEM1_EMENI	reviewed	Mitochondrial Rho GTPase 1 (EC 3.6.5.-) (GTPase EF-hand protein of mitochondria 1)	gem1 AN4167	Emericella nidulans (strain FGSC A4 / ATCC 38163 / CBS 112.46 / NRRL 194 / M139) (Aspergillus nidulans)	634	MLCCMRICVCGDEGTGKSSLITSLVKGVFVTNKIQPILPQITIPPTIGTPENVTTTTVVDTSAVPQERSNLAREIRKSNVILLVYSDHYSYERVALFWLPYFRSLGVNVPVVLCANKSDLAADHTETQVIEDEMLPLMSEFKEIDSCIRTSAREHRNVNEAFFLCQKAVTHPIAPLFDAKESALKPAAVAALQRIFYLSDKDRDGYLSDKEIKDFQMRCFEKPLSEEDLVHIKETIQKTHPDSVTPSGIDCRGFIHLNKMYAEKGRHETVWIILRAFQYTDSLSLQESYLHPKFEVPPFASAELSPEGYRFFVNLFLLSDKDNDGGLNDAELASLFAPTPGLPPSWADGSFPSCTVRNEAGHVTLQGWLAQWSMTTFTSPKTTLEYLAYLGFESSDRSN…			NP_BIND 11 18 GTP 1. {ECO:0000255}.; NP_BIND 60 64 GTP 1. {ECO:0000255}.; NP_BIND 116 119 GTP 1. {ECO:0000255}.; NP_BIND 432 439 GTP 2. {ECO:0000255}.; NP_BIND 468 472 GTP 2. {ECO:0000255}.; NP_BIND 538 541 GTP 2. {ECO:0000255}.
Q2UM43	GEM1_ASPOR	reviewed	Mitochondrial Rho GTPase 1 (EC 3.6.5.-) (GTPase EF-hand protein of mitochondria 1)	gem1 AO090003000148	Aspergillus oryzae (strain ATCC 42149 / RIB 40) (Yellow koji mold)	633	MATVRICVCGDEGTGKSSLITSLVKGVFVTNKIQPILPQITIPPTIGTPENVTTTTVVDTSALPQERSNLAREIRKSNVILLVYSDHYSYERVALFWLPYFRSLGVNVPVVLCANKSDLAADHSEAQVIEEEMLPLMAEFKEIDSCIRTSAREHRNVNEAFFLCQKAVTHPIAPLFDSKESALKPAAVAALQRIFYLSDKDRDGYLSDKELEDFQMRCFEKPLSEEDLVHIKETIQKTHPTSVAPSGIDCRGFIHLNKMYAEKGRHETVWIILRAFQYTDNLSLQESFLHPRFEVPPYASAELSPEGYRFFVNLFLLSDKDNDGGLNDAELASLFAPTPGLPASWADGSFPSSTVRNEAGHVTLQGWLAQWSMTTFTSPKTTLEYLAYLGFESSDRSNP…			NP_BIND 10 17 GTP 1. {ECO:0000255}.; NP_BIND 59 63 GTP 1. {ECO:0000255}.; NP_BIND 115 118 GTP 1. {ECO:0000255}.; NP_BIND 431 438 GTP 2. {ECO:0000255}.; NP_BIND 467 471 GTP 2. {ECO:0000255}.; NP_BIND 537 540 GTP 2. {ECO:0000255}.
Q4PB75	GEM1_USTMA	reviewed	Mitochondrial Rho GTPase 1 (EC 3.6.5.-) (GTPase EF-hand protein of mitochondria 1)	GEM1 UMAG_02638	Ustilago maydis (strain 521 / FGSC 9021) (Corn smut fungus)	752	MRKDVRIVLAGDPDVGKSTLITSLVKEAYVAKVQKVVPPITLPPEVAPEAVVTKIVDTSSSPEHRANLEAELRRANVICIVYSISAPSSFDRIPTYWLPYIRSLGVNVPVILVGNKIDLRSGDVTNAALEDELAPVMAEFKEVETCVECSARIPLNVSEVFYFAQKAVLYPTAPLYDSREHVLKPACVDALKRIFRLCDSDKDGLLSDGELNDFQRKCFDTPLQAQELEGIKDLVVQAPIAGLRYNHENSSVAASGSSANGDIPSHHPHLREGSLTMAGFLYLHTLFIQRGRLETTWTVLRTFGYGVDLSLQDSFVKPAFAVPPECSVELSPNGYQFLTDIFEVHDKDRDGALSEEELDSLFITAPDNRHPWQGTGFPTSTITDEHGAVTLQGWLAQWS…			NP_BIND 11 18 GTP 1. {ECO:0000255}.; NP_BIND 57 61 GTP 1. {ECO:0000255}.; NP_BIND 115 118 GTP 1. {ECO:0000255}.; NP_BIND 490 497 GTP 2. {ECO:0000255}.; NP_BIND 526 530 GTP 2. {ECO:0000255}.; NP_BIND 595 598 GTP 2. {ECO:0000255}.
Q6CY37	GEM1_KLULA	reviewed	Mitochondrial Rho GTPase 1 (EC 3.6.5.-) (GTPase EF-hand protein of mitochondria 1)	GEM1 KLLA0A03465g	Kluyveromyces lactis (strain ATCC 8585 / CBS 2359 / DSM 70799 / NBRC 1267 / NRRL Y-1140 / WM37) (Yeast) (Candida sphaerica)	659	MTKTRIRIVVCGDSGVGKTSLIACLVKDQFISWLQDVLPPITIPKDFSSSRYSPENTVVVDTGNSDLATLHKELKNADVIWLVYSDHDSYERIALYWMMMFRSLGVNLPVVLCRNKCDDEVEFLSSANIMDSDDDQLDNKIEDEEFIPILREFKEVETCIKASAKFKFNVNQAFYLCQRTITNPVAPLFDARIGELKPLGVLALKRVFVLSDMDQDGFLNDDEITKLQKKCFSKAVDVNELQFLKDTLTSISSPNQEYEDYILNVPGKGITKDGFLVLNKIYAEKGRHETTWGILRAFHYTDTLTINEKILRPKIDIPQSSSVELSPLGYRFFVDTFLKYDKDNDGGLNNDELHLLFKTTPGLPHLWIETNFPFLTVVNNSACITLQGWLALWSMTTFI…			NP_BIND 12 19 GTP 1. {ECO:0000255}.; NP_BIND 61 63 GTP 1. {ECO:0000255}.; NP_BIND 115 118 GTP 1. {ECO:0000255}.; NP_BIND 453 460 GTP 2. {ECO:0000255}.; NP_BIND 489 493 GTP 2. {ECO:0000255}.; NP_BIND 558 561 GTP 2. {ECO:0000255}.
P0CO79	GEM1_CRYNB	reviewed	Mitochondrial Rho GTPase 1 (EC 3.6.5.-) (GTPase EF-hand protein of mitochondria 1)	GEM1 CNBF0860	Cryptococcus neoformans var. neoformans serotype D (strain B-3501A) (Filobasidiella neoformans)	686	MPRRDLVRIVLVGDDGVGKSSIITSLIKEAFVTNVPHVVPEVTIPPEITPENFTTSIVDTSSNPRSRPHLLSSISRAHVICLVYSIADPSSFDRVAEYWLPLFRREGINVPVILVGNKIDLRGGRVTNQGLEDESAPIMREFKEVETVVECSALLPLNVSEVFYFAQKAVLHPTAPLYDSREHTLKPKCLEALKRIFTISDVDKDGLLNAHELNQFQQKCFSTPLQSQELDGILEIVRSYDPYAVQPLPSSSPNTPLSRDSSYGQLHYFNNNVVPPSPPQEGITELGFLYLHTMFIQQGRMETTWTVLRKFGYGESLDLREDFLAPKFDVPSDCSVELSPLGNQFLTDIFEAYDKDQDGALSQNELDDLFSTSPGNPWLSQGFPDTTITDDMGRVTLQG…			NP_BIND 13 20 GTP 1. {ECO:0000255}.; NP_BIND 59 63 GTP 1. {ECO:0000255}.; NP_BIND 117 120 GTP 1. {ECO:0000255}.; NP_BIND 464 471 GTP 2. {ECO:0000255}.; NP_BIND 506 510 GTP 2. {ECO:0000255}.; NP_BIND 574 577 GTP 2. {ECO:0000255}.
Q6C2J1	GEM1_YARLI	reviewed	Mitochondrial Rho GTPase 1 (EC 3.6.5.-) (GTPase EF-hand protein of mitochondria 1)	GEM1 YALI0F07491g	Yarrowia lipolytica (strain CLIB 122 / E 150) (Yeast) (Candida lipolytica)	665	MTNDVIRIVVCGDEGVGKSSLITSLIKDTYVPNIQKLLPPITIPKGFSSSPDAPLSTVIVDTQFSNSPAEAEHLHREIRQANVIWLVYSDHYSCERVSIFWLPYFRNLGVNLPIVLCANVFDDVDSWNSRDSERIISDEMIPILREFKEIESCIRVSAKLNHNINQAFYLCQKAVMHPIAPLFDAKEGKLKPNAVAALQRVFFLSDRDQDGYLSDQEMLELQVKCFGRSFDATDLIQIRAQLAKINPALATERGVSEEGFITLNRLYADKGRHETTWGILRTFHYTDYLSLSDQFLYPKLDVPENSSVELSPEGYRFLVDLFLLFDKDNDGGLNDSELKTLFKPTPGIPQKWLDFNFPYTTVHDEQGSITLQGWLALWSMTTFLDYKTTMAYLAYLGFE…			NP_BIND 12 19 GTP 1. {ECO:0000255}.; NP_BIND 61 67 GTP 1. {ECO:0000255}.; NP_BIND 119 122 GTP 1. {ECO:0000255}.; NP_BIND 461 468 GTP 2. {ECO:0000255}.; NP_BIND 498 502 GTP 2. {ECO:0000255}.; NP_BIND 567 570 GTP 2. {ECO:0000255}.
Q4WN24	GEM1_ASPFU	reviewed	Mitochondrial Rho GTPase 1 (EC 3.6.5.-) (GTPase EF-hand protein of mitochondria 1)	gem1 AFUA_6G07870	Neosartorya fumigata (strain ATCC MYA-4609 / Af293 / CBS 101355 / FGSC A1100) (Aspergillus fumigatus)	632	MATVRICVCGDEGTGKSSLITSLVKGVFVTNKIQPVLPQITIPPTIGTPENVTTTTVVDTSALPQERSNLAREIRKSNVILLVYSDHYSYERVALFWLPYFRSLGVNVPVVLCANKSDLAADHTEAQVIEEEMLPVMAEFKEIDSCIRTSAREHRNVNEAFFLCQKAVTHPIAPLFDSKESALKPAAVAALQRIFYLSDKDRDGYLSDKEIEDFQMRCFDKPLSKEDLVHIKETIQKTHPDSVTPFGIDCRGFIHLNKMYAEKGRHETVWIILRAFQYTDNLSLQESFLHPRFEVPPFASAELSPEGYRFFVNLFLLSDKDNDGGLNDAELASLFAPTPGLPASWADGSFPSSTVRNEAGHVTLQGWLAQWSMTTFQSPKTTLEYLAYLGFESSDRSNP…			NP_BIND 10 17 GTP 1. {ECO:0000255}.; NP_BIND 59 63 GTP 1. {ECO:0000255}.; NP_BIND 115 118 GTP 1. {ECO:0000255}.; NP_BIND 431 438 GTP 2. {ECO:0000255}.; NP_BIND 467 471 GTP 2. {ECO:0000255}.; NP_BIND 537 540 GTP 2. {ECO:0000255}.
Q4I2W2	GEM1_GIBZE	reviewed	Mitochondrial Rho GTPase 1 (EC 3.6.5.-) (GTPase EF-hand protein of mitochondria 1)	GEM1 FGRRES_08446_M FGSG_08446	Gibberella zeae (strain PH-1 / ATCC MYA-4620 / FGSC 9075 / NRRL 31084) (Wheat head blight fungus) (Fusarium graminearum)	627	MATVRICVCGDESTGKSSLIASLVKDQFVNNKIQPVLPQITIPPSIGTPENVSTTIVDTSARPQDRTTLRKEIRKCNVILLVYADHYSYERVALFWMPYFRSLGVNVPVVLCANKSDLVGQGTTPQVVEEELLPVMAEFREVDSCIRTSARDHRNVNEVFFLCQKAVTHPIAPLFDYKEGHLKPLCINALKRIFYLCDKDQDGYLNEQEMRDFQARCFDKPLTTDDLDNIKLSIAKSLPASDLEKGIDLPGFLQLNKLYAEKGRHETIWIILRKFHYTDSLSLEDKFIRPKFEVPEYSSAELSPAGYRFFVDLFLIFDKDNDGGLNDEELEALFAPAPGLPSSWTDSSFPSSTVRNEAGHVTLQGWLAQWSMTTFIEPKTTIEYLAYLGFEPSNPKDSI…			NP_BIND 10 17 GTP 1. {ECO:0000255}.; NP_BIND 58 62 GTP 1. {ECO:0000255}.; NP_BIND 114 117 GTP 1. {ECO:0000255}.; NP_BIND 429 436 GTP 2. {ECO:0000255}.; NP_BIND 465 469 GTP 2. {ECO:0000255}.; NP_BIND 534 537 GTP 2. {ECO:0000255}.
Q7RZA2	GEM1_NEUCR	reviewed	Mitochondrial Rho GTPase 1 (EC 3.6.5.-) (GTPase EF-hand protein of mitochondria 1)	gem-1 G17A4.060 NCU03966	Neurospora crassa (strain ATCC 24698 / 74-OR23-1A / CBS 708.71 / DSM 1257 / FGSC 987)	629	MSTAVRICVCGDEGTGKSSLIASLVKGVFVANKIQAVLPQVTIPPTTGTPENVTTTIVDTSARPQDRTTLRKEIRKSNVILLVYSDHYSYERVALFWMPYFRSLGVNVPVVLCANKSDLVSDGNAAQVAEEEMLPVMAEFREIDSCIRTSAKEQKNVIEVFYLCQKAVTHPIAPLFDYKEGQLKPACVDALRRIFFLSDKDQDGYLNDQEMQDFQQKSFDKPLSQEDLDNIKLTVSKSVPSSSTDKGLDLRGFLQLNKLYAEKGRHETIWIILRKYHYTDSLSLEDSFLHPRFDVPDYASAELSPAGYRFFMDLFLTFDKDNDGGLNDRELAALFAPTPGLPHSWAETSFPSTTVRNEAGHITLQGWLAQWSMTTFLEPKTTLEYLAYLGFETPNARET…			NP_BIND 11 18 GTP 1. {ECO:0000255}.; NP_BIND 59 63 GTP 1. {ECO:0000255}.; NP_BIND 115 118 GTP 1. {ECO:0000255}.; NP_BIND 430 437 GTP 2. {ECO:0000255}.; NP_BIND 466 470 GTP 2. {ECO:0000255}.; NP_BIND 535 538 GTP 2. {ECO:0000255}.
