# Supplementary material for: G-domain prediction across the diversity of G protein families
Source: Research Square preprint supplement (doi:10.21203/rs.3.rs-1102638/v1), 2021-12-02
Supplement: Supplementary file 6 [file Dynamin-type guanine nucleotide-binding (G) domain signature and profile.xlsx]

## Sheet: Sheet0
Entry
